# Supplementary material for: Overestimation of volatility in schizophrenia and autism? A comparative study using a probabilistic reasoning task
Source: PubMed Central journal article supplement (PMC7790240; doi:10.1371/journal.pone.0244975), 2021-01-07
Supplement: pone.0244975.s001.pdf [file pone.0244975.s001.pdf]

# S1 - mathematical model

## 1 Game rules

- There are two bags, bag  $A$  and bag  $B$ . The bags are filled with white and black balls. In bag  $A$  the fraction of white balls is  $p$ , whereas in bag  $B$  the fraction of white balls is  $1 - p$ .
- The game starts by the administrator drawing one of the bags at random. Let  $x_1 = 0$  if the result is bag  $A$  and  $x_1 = 1$  otherwise. Thus,

$$P(x_1 = 0) = P(x_1 = 1) = \frac{1}{2}.$$

- If  $x_1 = 0$ , the administrator is sampling a ball from bag  $A$  at random, and if  $x_1 = 1$  the administrator is sampling a ball from bag  $B$  at random. The ball sampled is shown to the player and put back into the same bag as it was sampled from. Let  $z_1 = 0$  if the draw results in a white ball, and  $z_1 = 1$  otherwise. Thus,

$$P(z_1 | x_1) = p^{I(z_1=x_1)}(1-p)^{1-I(z_1=x_1)},$$

where  $I(\cdot)$  equals 1 if the argument is true and zero otherwise.

- For  $i = 2, \dots, n$  sequentially:
  - The administrator puts  $x_i = 1 - x_{i-1}$  or  $x_i = x_{i-1}$  with probabilities  $v$  and  $1 - v$ , respectively.
  - If  $x_i = 0$ , the administrator is sampling a ball from bag  $A$  at random, and if  $x_i = 1$  the administrator is sampling a ball from bag  $B$  at random. The ball sampled is shown to the player and put back into the same bag as it was sampled from. Let  $z_i = 0$  if the draw results in a white ball, and  $z_i = 1$  otherwise. Thus,

$$P(z_i | x_i) = p^{I(z_i=x_i)}(1-p)^{1-I(z_i=x_i)}.$$

- After each ball is shown to the player, the player should
  - say from which bag (s)he thinks the last ball is coming, and
  - give an estimate on the probability that the last ball came from bag  $A$ .

## 2 Wanted results

In this note we discuss how to obtain the following

- Assuming the value of  $v$  to be known, compute the ideal Bayesian probability for the last ball to come from bag A, i.e. compute

$$P(x_n|z_1, \dots, z_n, v) \quad (1)$$

for each value of  $n$ .

- Assuming the value of  $v$  to be unknown, use the given probability estimates given by the player to estimate the value of  $v$  assumed by the player.

## 3 Computing $P(x_n|z_1, \dots, z_n, v)$

To find  $P(x_n|z_1, \dots, z_n, v)$ , one must first study  $P(x_1, \dots, x_n, z_1, \dots, z_n|v)$ . From the game rules it follows that

$$\begin{aligned} P(x_1, \dots, x_n, z_1, \dots, z_n|v) &= P(x_1, \dots, x_n|v) \cdot P(z_1, \dots, z_n|x_1, \dots, x_n) \\ &= \frac{1}{2} \prod_{i=2}^n \left[ v^{1-I(x_i=x_{i-1})} (1-v)^{I(x_i=x_{i-1})} \right] \prod_{i=1}^n \left[ p^{I(z_i=x_i)} (1-p)^{1-I(z_i=x_i)} \right]. \end{aligned} \quad (2)$$

We have

$$\begin{aligned} P(x_n|z_1, \dots, z_n, v) &= \frac{P(x_n, z_1, \dots, z_n|v)}{P(z_1, \dots, z_n|v)} \\ &\propto P(x_n, z_1, \dots, z_n|v) \\ &= \sum_{x_1} \cdots \sum_{x_{n-1}} P(x_1, \dots, x_n, z_1, \dots, z_n|v), \end{aligned} \quad (3)$$

where the proportionality is as a function of  $x_n$ . To find  $P(x_n|z_1, \dots, z_n, v)$  we therefore need to evaluate the  $n - 1$  sums in (3) for each possible value of  $x_n$  and thereafter scale the result so that the values sum to one. For small values of  $n$  direct evaluation of the  $n - 1$  sums in (3) is computationally feasible, but for larger values of  $n$  the Markov structure present in (2) must be utilised to get a computationally efficient procedure. In the following we assume  $n \geq 3$ . The joint distribution in (2) can then be factorised into

$$P(x_1, \dots, x_n|v, z_1, \dots, z_n) \propto h_{1,2}(x_1, x_2) \cdot h_{2,3}(x_2, x_3) \cdot \dots \cdot h_{n-1,n}(x_{n-1}, x_n), \quad (4)$$

where

$$h_{1,2}(x_1, x_2) = \frac{1}{2} v^{1-I(x_2=x_1)} (1-v)^{I(x_2=x_1)} p^{I(z_1=x_1)} (1-p)^{1-I(z_1=x_1)},$$

$$h_{i-1,i}(x_{i-1}, x_i) = v^{1-I(x_i=x_{i-1})} (1-v)^{I(x_i=x_{i-1})} p^{I(z_{i-1}=x_{i-1})} (1-p)^{1-I(z_{i-1}=x_{i-1})}$$

for  $i = 3, \dots, n - 1$ , and

$$h_{n-1,n}(x_{n-1}, x_n) = v^{1-I(x_n=x_{n-1})} (1-v)^{I(x_n=x_{n-1})} p^{I(z_{n-1}=x_{n-1})} (1-p)^{1-I(z_{n-1}=x_{n-1})}$$

$$\cdot p^{I(z_n=x_n)}(1-p)^{1-I(z_n=x_n)}.$$

One should note that all the  $h_{i-1,i}(x_{i-1}, x_i)$  functions also depends on the value of  $v$  and the values  $z_1, \dots, z_n$  even if this dependence is not explicitly represented in the notation. Defining

$$g_2(x_2) = \sum_{x_1} h_{1,2}(x_1, x_2) \quad (5)$$

and

$$g_i(x_i) = \sum_{x_{i-1}} g_{i-1}(x_{i-1})h_{i-1,i}(x_{i-1}, x_i) \quad (6)$$

for  $i = 3, \dots, n$ , we get that  $g_n(x_n)$  equals the right hand side of (3). Thus,

$$P(x_n|z_1, \dots, z_n, v) = \frac{g_n(x_n)}{\sum_x g_n(x)}. \quad (7)$$

To evaluate  $P(x_n|z_1, \dots, z_n, v)$  for each possible value of  $x_n$  can thereby be done in the following steps.

1. For each  $i = 2, \dots, n$ , evaluate  $h_{i-1,i}(x_{i-1}, x_i)$  for each possible combination of values for  $x_{i-1}$  and  $x_i$ . As the possible values for each of  $x_{i-1}$  and  $x_i$  is zero and one, four values must be computed for each value of  $i$ .
2. Using (5), compute  $g_2(x_2)$  for  $x_2 = 0$  and for  $x_2 = 1$ .
3. For  $i = 3, \dots, n$  in turn, use (6) to compute  $g_i(x_i)$  for  $x_i = 0$  and for  $x_i = 1$ .
4. Using (7), compute  $P(x_n|z_1, \dots, z_n, v)$  for  $x_n = 0$  and for  $x_n = 1$ .

## 4 Estimate the value of $v$ used by the player

We now assume the player is using a value of the parameter  $v$  when deciding on the probability estimates. We let  $K$  denote the number of games or rounds the player is playing, and assume that the player sees  $N$  balls in each play. We let  $\tilde{p}_{k,n}$  denote the probability estimate specified by the player after seeing ball number  $n$  in play number  $k$ . One should note that  $\tilde{p}_{n,k}$  is the players guess on the probability  $P(x_{k,n}|z_{k,1}, \dots, z_{k,n}, v)$ , where  $x_{k,n}$  and  $z_{k,i}$  corresponds to  $x_n$  and  $z_i$ , respectively, in Section 3, but where we have now added an index  $k$  to distinguish the  $K$  rounds played. As the theoretical probability  $P(x_{k,n}|z_{k,1}, \dots, z_{k,n}, v)$  is a function of  $v$ , one can formally estimate the value of  $v$  used by the player by finding the value that makes the set of theoretical probabilities  $P(x_{k,n}|z_{k,1}, \dots, z_{k,n}, v)$  as close as possible to the probability estimates  $\tilde{p}_{k,n}$ . More precisely, we suggest to estimate  $v$  by minimising the sum of squares of the differences between the probability estimate  $\tilde{p}_{k,n}$  specified by the player and the corresponding theoretical probability  $P(x_{k,n}|z_{k,1}, \dots, z_{k,n}, v)$ . Thus, we define the estimate as

$$\hat{v} = \operatorname{argmin}_v \left[ \sum_{k=1}^K \sum_{n=1}^N (\tilde{p}_{k,n} - P(x_{k,n}|z_{k,1}, \dots, z_{k,n}, v))^2 \right]. \quad (8)$$

The minimisation must be done by some numerical minimisation algorithm, within which the theoretical probabilities,  $P(x_{k,n}|z_{k,1}, \dots, z_{k,n}, v)$ , for any value of  $v$  can be computed as discussed in Section 3.
